# Supplementary material
Source: publisher figshare collection journal article supplement (https://frontiersin.figshare.com/ndownloader/files/28533771)
Supplement: Supplementary file [file 28533771]

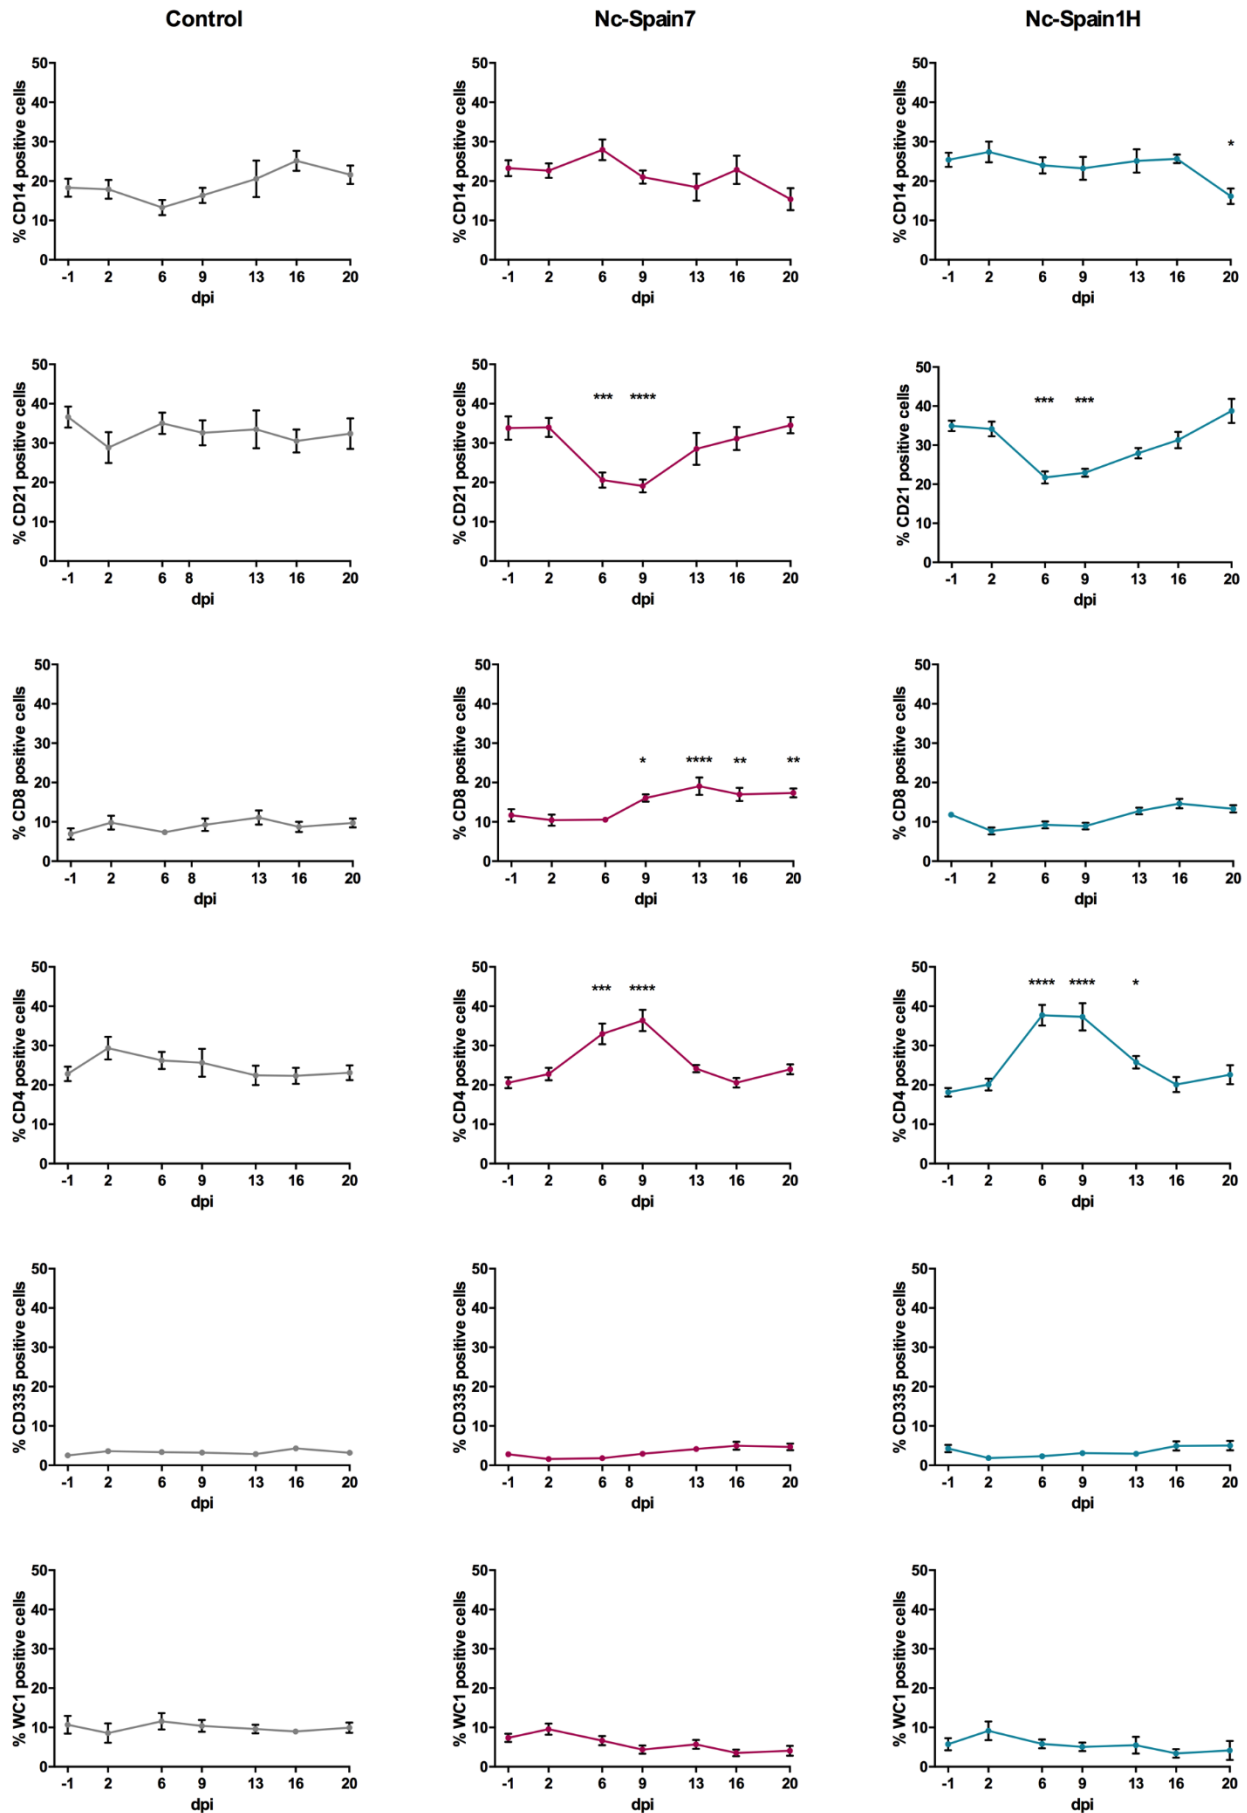

**Supplementary S1. Relative percentage of immune cells in a PBMC population from Nc-Spain7 and Nc-Spain1H infected heifers.** Graphs indicate the relative percentage of cells positive for CD21, WC1, CD4, CD8, CD14 and CD335 surface markers in PBMC obtained from uninfected heifers (G-Control) and heifers challenged with Nc-Spain7 (G-NcSpain7) and Nc-Spain1H (G-NcSpain1H) tachyzoites in relation to pre-infection values (-1 dpi). Asterisks indicate significant differences. \*\*\*\* $P < 0.0001$ , \*\*\* $P < 0.001$ , \*\* $P < 0.01$ , \* $P < 0.05$ .
